# Supplementary material for: Prevalence and drug-resistance patterns of methicillin-resistant Staphylococcus aureus and extended-spectrum β-lactamase producing Enterobacteriaceae among raw vegetables
Source: Research Square preprint supplement (doi:10.21203/rs.3.rs-7817844/v1), 2025-11-05
Supplement: Supplementary file 1 [file 965da96c909f8faffadad2d2.pdf]

**Assessments related to the vendor and purchased vegetable items, Aroge Gebeya, Hawassa city, Sidama, Ethiopia, 2024**

| Assessments related to the vendor and purchased vegetable items |                                |                                      |
|-----------------------------------------------------------------|--------------------------------|--------------------------------------|
| SN                                                              | Question                       | Coding                               |
| 1.                                                              | Sex of Vendor                  | 1. Male                              |
|                                                                 |                                | 2. Female                            |
| 2.                                                              | Age of Vendor                  | (In years) _____                     |
| 3.                                                              | Vendor training on food safety | 1. Yes                               |
|                                                                 |                                | 2. No                                |
| 4.                                                              | Kinds of Produce               | 1. Tomato                            |
|                                                                 |                                | 2. Potato                            |
|                                                                 |                                | 3. Carrot                            |
|                                                                 |                                | 4. Lettuce                           |
|                                                                 |                                | 5. Red Onion                         |
|                                                                 |                                | 6. Kale                              |
| 5.                                                              | Means of Display               | 1. On Stall                          |
|                                                                 |                                | 2. Without Stall                     |
| 6.                                                              | Collection Time                | 1. Morning (specified time: _____)   |
|                                                                 |                                | 2. Afternoon (specified time: _____) |
| 7.                                                              | Collection point               | 1. At distributor site               |
|                                                                 |                                | 2. At vendor site                    |
| 8.                                                              | Collection date                | 1. Routine date                      |
|                                                                 |                                | 2. Market date                       |
| 9.                                                              | Condition of the items         | 1. intact                            |
|                                                                 |                                | 2. spoiled                           |
